# Supplementary material
Source: publisher site journal article supplement (https://www.dovepress.com/article/349956)
Supplement: Supplementary file 1 [file get_supplementary_file.php]

| Supplementary Table 1 Independent risk factors of mortality analyzed by multivariate logistic regression | | | |
| --- | --- | --- | --- |
| Variables | OR | 95% CI | p |
| GCS | 0.712 | 0.641-0.790 | <0.001 |
| Delayed cerebral ischemia | 7.608 | 3.363-17.211 | <0.001 |
| *GCS* Glasgow Coma Scale. | | | |

| Supplementary Table 2 Independent risk factors of unfavorable functional outcome analyzed by multivariate logistic regression | | | |
| --- | --- | --- | --- |
| Variables | OR | 95% CI | p |
| age | 1.048 | 1.018-1.079 | 0.002 |
| GCS | 0.760 | 0.687-0.842 | <0.001 |
| mFisher | 1.616 | 1.069-2.443 | 0.023 |
| Delayed cerebral ischemia | 8.304 | 3.350-20.583 | <0.001 |
| *GCS* Glasgow Coma Scale, *mFisher* modified Fisher. | | | |
